# Supplementary material for: MutS/MutL crystal structure reveals that the MutS sliding clamp loads MutL onto DNA
Source: eLife journal article supplement (doi:10.7554/elife.06744), 2015-07-11
Supplement: supp [file elife-06744-supp-v1.zip]

**A) 4.7 Å – crystal form I**

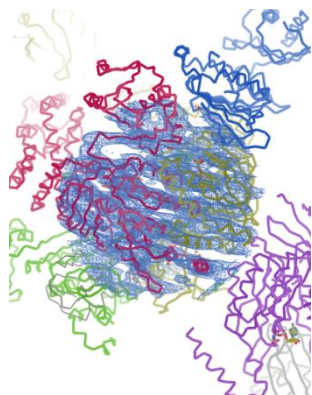

*ATPase domains*

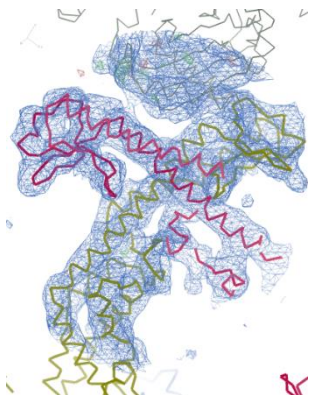

*Clamp domains*

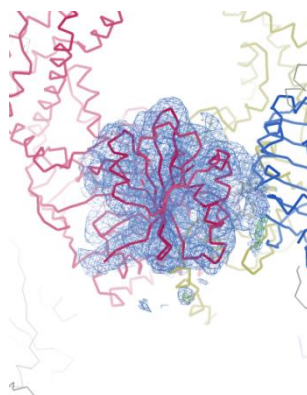

*Connector domain*

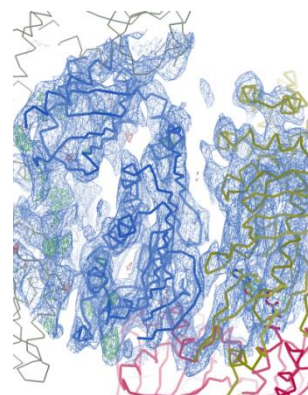

*MutL<sup>LN40</sup>*

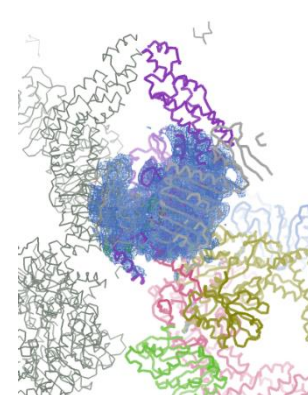

*Crystallographic dimer*

**B) 6.6 Å – crystal form 2**

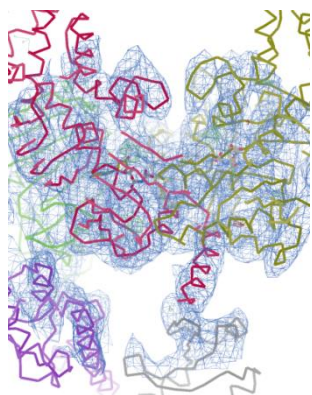

*ATPase domains*

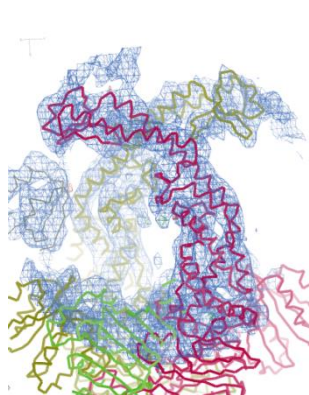

*Clamp domains*

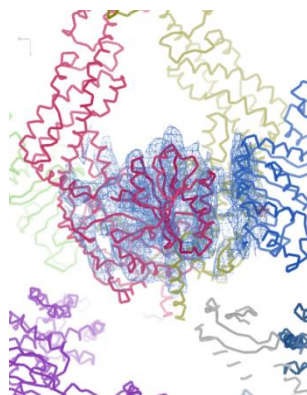

*Connector domain*

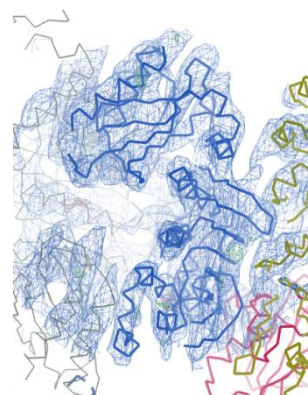

*MutL<sup>LN40</sup>*

**C) 7.6 Å – crystal form 3**

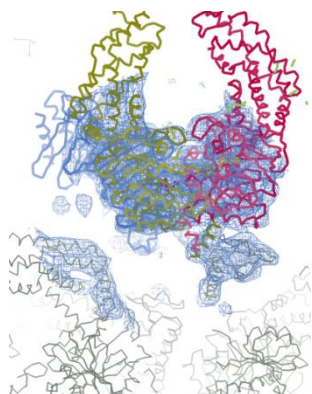

*ATPase domains*

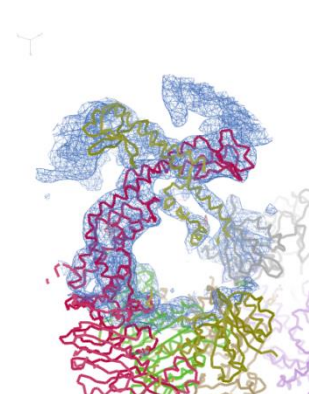

*Clamp domains*

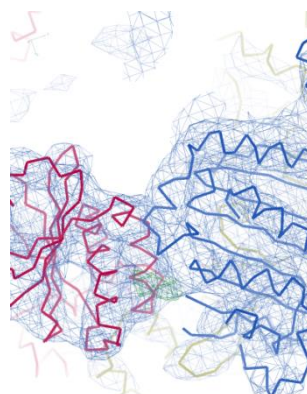

*Connector domain*

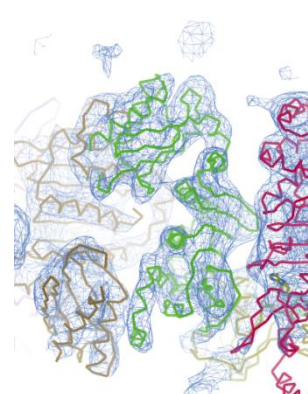

*MutL<sup>LN40</sup>*
