# Supplementary figures and images for: MutS/MutL crystal structure reveals that the MutS sliding clamp loads MutL onto DNA
Source: eLife journal article supplement (doi:10.7554/elife.06744), 2015-07-11

A

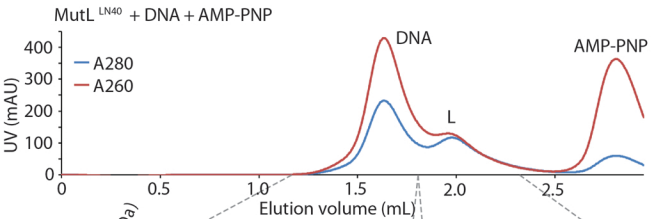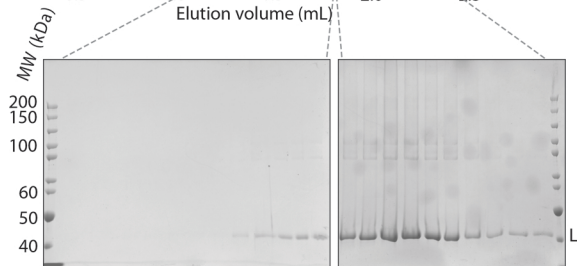

B

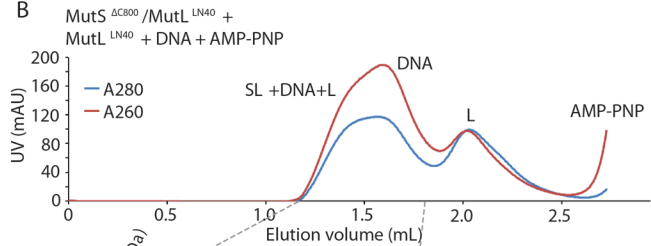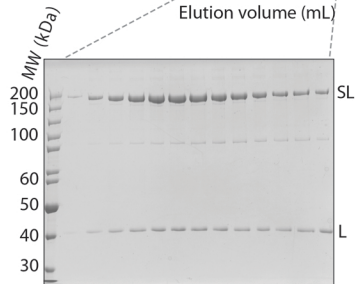

H

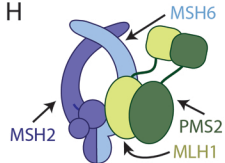

Supplement: supp [file elife-06744-supp-v1.zip]

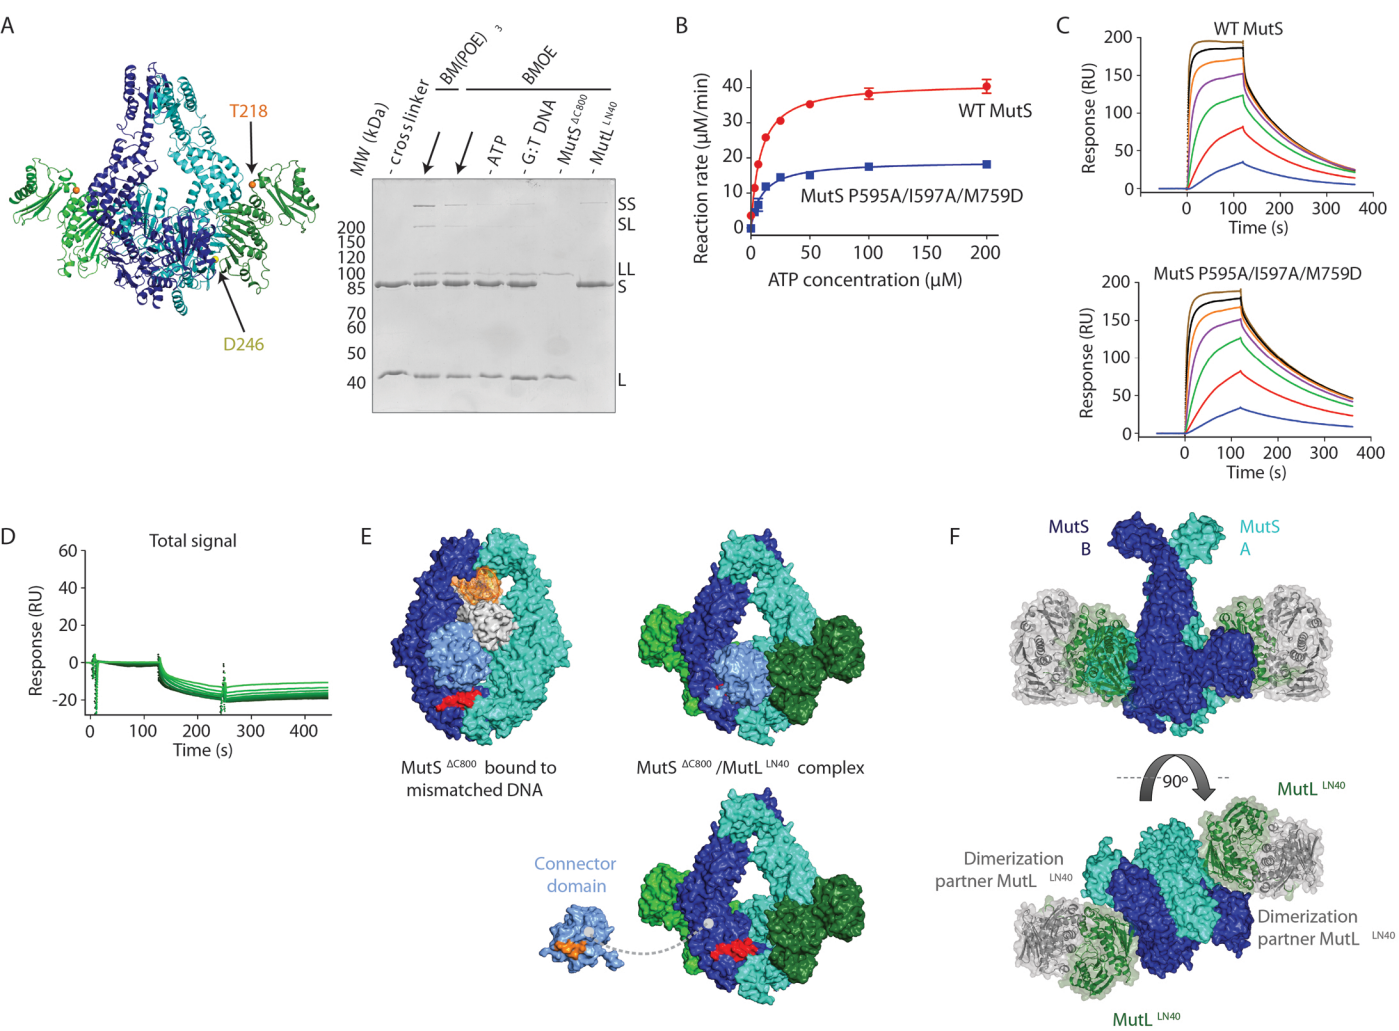

Supplement: supp [file elife-06744-supp-v1.zip]

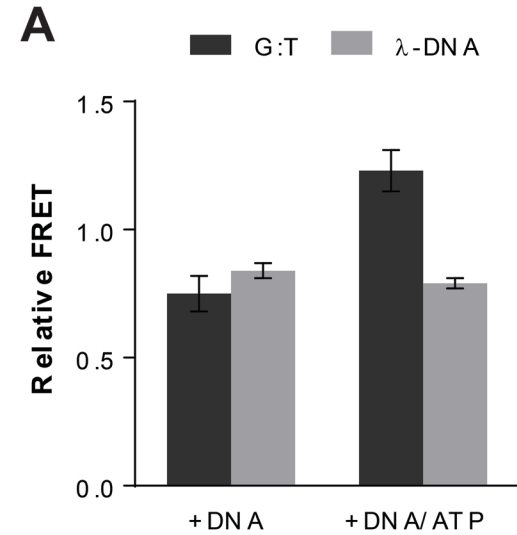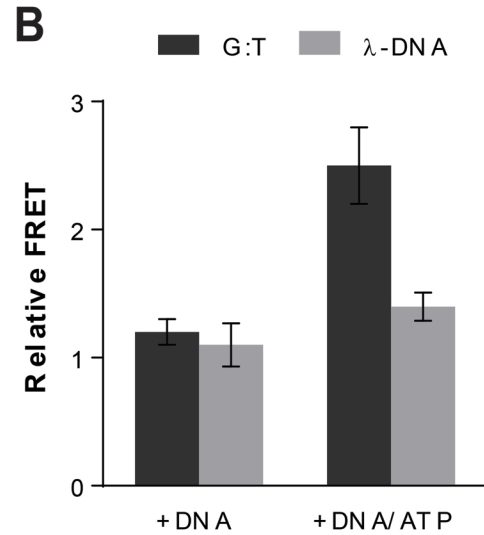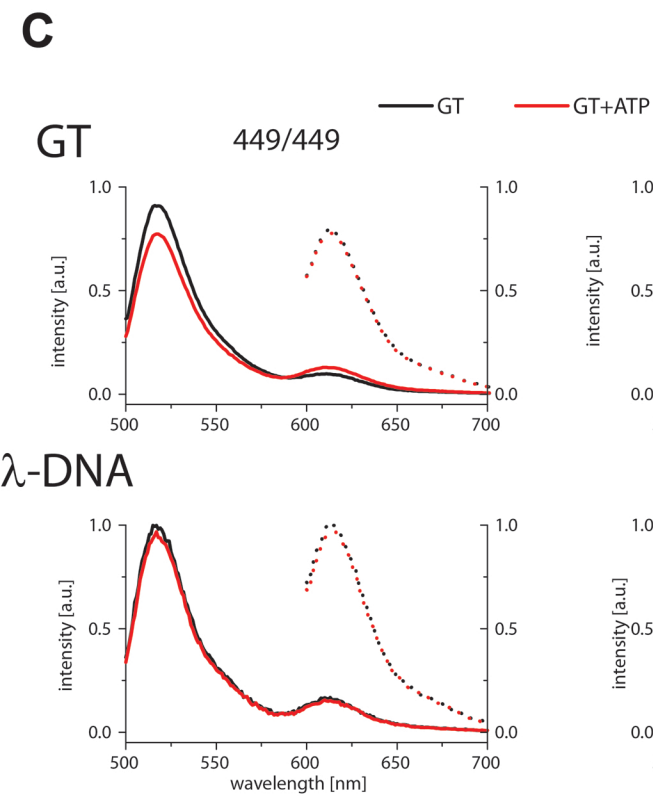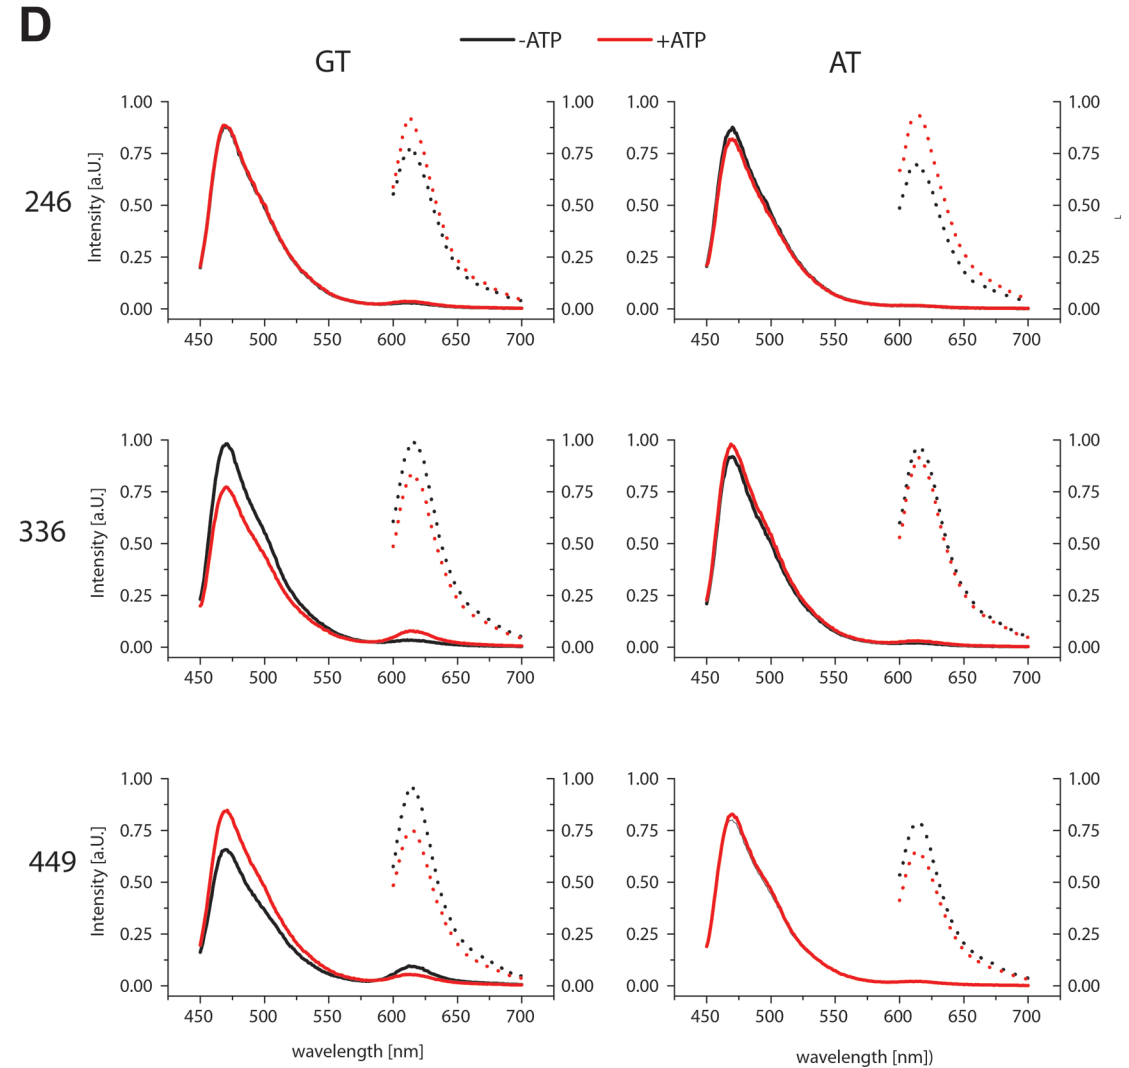

Supplement: supp [file elife-06744-supp-v1.zip]
